# Supplementary material for: Construction of the Metabolomics-Based Prognosis-Prediction Models for ICU Septic Patients
Source: Research Square preprint supplement (doi:10.21203/rs.3.rs-571120/v1), 2021-06-02
Supplement: Supplementary file 1 [file 2270d9799d354e18583bc571.docx]

**Supplementary Table 1**. Baseline characteristics and clinical parameters between 28dS and 28dD.

| Variables | 28dS (n=47) | 28dD (n=49) | *P* value |
| --- | --- | --- | --- |
| (Mean ± SD） | (Mean ± SD） |
| Gender [number (%)] |  |  | 0.428 |
| Male | 26 (55.3%) | 31 (63.3%) |  |
| Female | 21 (44.7%) | 18 (36.7%) |  |
| Age | 50.34 ± 2.90 | 57.41 ± 2.17 | 0.054 |
| Smoke [number (%)] |  |  | 0.297 |
| Yes | 10 (21.3%) | 15 (30.6%) |  |
| No | 37 (78.7%) | 34 (69.4%) |  |
| Alcohol [number (%)] |  |  | 1.000 |
| Yes | 5 (10.6%) | 5 (10.0%) |  |
| No | 42 (89.4%) | 44 (90.0%) |  |
| TEMP | 37.00 ± 0.12 | 37.03 ± 0.11 | 0.554 |
| RR | 19.81 ± 0.59 | 20.92 ± 0.70 | 0.214 |
| HR | 88.72 ± 2.50 | 103.78 ± 4.11 | 0.002****** |
| BPH | 121.40 ± 2.97 | 118.80 ± 3.45 | 0.569 |
| BPL | 64.83 ± 1.69 | 64.80 ± 2.01 | 0.990 |
| WBC | 16.89 ± 5.23 | 12.25 ± 1.16 | 0.942 |
| RBC | 3.31 ± 0.09 | 3.19 ± 0.13 | 0.878 |
| Hb | 99.00 ± 2.95 | 94.54 ± 3.47 | 0.332 |
| PLT | 125.93 ± 13.58 | 129.00 ± 18.30 | 0.477 |
| Neut% | 54.61 ± 5.65 | 60.12 ± 5.64 | 0.872 |
| Lymph% | 6.82 ± 0.74 | 10.26 ± 2.05 | 0.944 |
| Mono% | 3.50 ± 0.67 | 6.79 ± 2.09 | 0.892 |
| Eos% | 0.63 ± 0.23 | 0.44 ± 0.23 | 0.084 |
| Neut# | 8.99 ± 1.03 | 9.19 ± 1.04 | 0.886 |
| Lymph# | 0.71 ± 0.09 | 0.86 ± 0.20 | 0.977 |
| Mono# | 3.34 ± 0.15 | 3.22 ± 0.16 | 0.597 |
| Eos# | 0.04 ± 0.01 | 0.02 ± 0.01 | 0.305 |
| Baso# | 0.05 ± 0.01 | 0.05 ± 0.01 | 0.341 |
| HCT | 12.19 ± 4.59 | 9.09 ± 3.79 | 0.939 |
| MCV | 81.33 ± 2.95 | 84.69 ± 3.01 | 0.286 |
| MCH | 68.35 ± 14.92 | 63.26 ± 13.13 | 0.605 |
| MCHC | 297.89 ± 16.71 | 300.88 ± 17.21 | 0.543 |
| RDW | 15.07 ± 1.38 | 15.77 ± 1.35 | 0.367 |
| MPV | 8.28 ± 0.48 | 9.50 ± 1.42 | 0.947 |
| Pct | 2.18 ± 0.80 | 2.07 ± 0.78 | 0.878 |
| PDW | 14.82 ± 0.84 | 15.43 ± 0.77 | 0.446 |
| NRBC | 0.03 ± 0.01 | 1.11 ± 1.00 | 0.559 |
| NRBC% | 3.21 ± 1.21 | 0.09 ± 1.60 | 0.621 |
| Glu | 9.68 ± 0.81 | 9.54 ± 1.08 | 0.769 |
| Sur | 15.08 ± 2.69 | 32.89 ± 12.12 | 0.130 |
| Scr | 98.52 ± 10.61 | 137.45 ± 18.52 | 0.137 |
| UA | 240.51 ± 19.00 | 289.64 ± 22.22 | 0.072 |
| ALT | 56.15 ± 9.18 | 118.36 ± 51.05 | 0.200 |
| AST | 51.60 ± 6.61 | 171.68 ± 82.93 | 0.350 |
| GGT | 100.36 ± 24.12 | 52.39 ± 32.96 | 0.439 |
| ALP | 118.76 ± 9.89 | 137.05 ± 24.77 | 0.228 |
| TP | 51.51 ± 1.72 | 51.08 ± 1.81 | 0.980 |
| Alb | 26.99 ± 0.83 | 26.13 ± 0.92 | 0.496 |
| Glo | 27.52 ± 0.95 | 28.29 ± 1.01 | 0.580 |
| SchE | 5.80 ± 0.76 | 6.09 ± 1.91 | 0.005****** |
| TBIL | 32.34 ± 6.19 | 65.92 ± 17.28 | 0.295 |
| DBIL | 25.95 ± 5.65 | 50.68 ± 14.03 | 0.383 |
| IBIL | 7.85 ± 0.83 | 16.05 ± 3.32 | 0.275 |
| LDH | 675.97 ± 130.08 | 1186.05 ± 346.40 | 0.132 |
| CK | 309.66 ± 56.43 | 630.49 ± 273.93 | 0.997 |
| CK-MB | 84.59 ± 27.02 | 85.92 ± 31.41 | 0.668 |
| TC | 2.52 ± 0.20 | 2.51 ± 0.18 | 0.981 |
| TG | 2.23 ± 0.37 | 1.56 ± 0.16 | 0.446 |
| HDL | 0.87 ± 0.12 | 0.88 ± 0.13 | 0.927 |
| LDL | 18.00 ± 6.00 | 19.38 ± 8.58 | 0.310 |
| α-AMY | 89.84 ± 10.91 | 134.89 ± 46.13 | 0.872 |
| Lip | 115.12 ± 35.28 | 44.26 ± 5.88 | 0.084 |
| GFR | 78.40 ± 7.33 | 65.64 ± 7.33 | 0.182 |
| PT | 24.03 ± 4.12 | 20.16 ± 2.64 | 0.942 |
| PA | 70.17 ± 4.78 | 65.95 ± 4.79 | 0.647 |
| INR | 4.50 ± 1.30 | 6.29 ± 2.00 | 0.616 |
| APTT | 29.38 ± 1.69 | 30.33 ± 1.98 | 0.997 |
| FIB | 4.88 ± 0.70 | 6.11 ± 1.09 | 0.426 |
| TT | 13.22 ± 0.82 | 14.54 ± 0.87 | 0.082 |
| DD | 3.03 ± 0.62 | 6.89 ± 2.43 | 0.166 |
| FDP | 21.66 ± 7.80 | 17.32 ± 6.80 | 0.217 |
| Lac | 14.63 ± 4.98 | 21.89 ± 7.11 | 0.071 |
| CRP | 151.08 ± 16.37 | 154.42 ± 14.38 | 0.668 |
| PCT | 9.69 ± 1.97 | 11.88 ± 2.69 | 0.800 |
| SOFA | 6.49 ± 0.70 | 10.96 ± 0.90 | 0.000******* |
| APACHEII | 13.18 ± 1.01 | 17.91 ± 0.97 | 0.001****** |
| GCS | 11.30 ± 0.64 | 9.94 ± 0.68 | 0.137 |
| 24h UV | 2469.77 ± 184.96 | 1865.44 ± 177.86 | 0.046***** |
| Respiratory support [number (%)] |  |  | 0.000******* |
| Yes | 19 (40.4%) | 38 (77.6%) |  |
| No | 28 (59.6%) | 11 (22.4%) |  |
| Application of pressor drugs [number (%)] |  |  | 0.000******* |
| Yes | 11 (23.4%) | 34 (69.4%) |  |
| No | 36 (76.6%) | 15 (30.6%) |  |

*SD, standard deviation; 28dS, 28d survival group; 28dD, 28d death group; TEMP, temperature*; *RR, respiratory rate;* *HR, heart rate*；*BPH, blood pressure (high);* *BPL, blood pressure (low); WBC, white blood cell count; RBC, red blood cell count; Hb, hemoglobin; PLT, platelet count; Neut%, neutrophil percent; Lymph%, lymphocyte percent; Mono%, monocyte percent; Eos%, eosinophil percent; Neut#, neutrophil count; Lymph#, lymphocyte count;* Mono#, *monocyte count; Eos#, eosinophil count; Baso#, basophil count; HCT, hematocrit; MCV, mean corpuscular volume; MCH, mean corpuscular hemoglobin; MCHC, mean corpuscular hemoglobin concentration; RDW, red blood cell volume distribution width; MPV, mean platelet volume; Pct, platelet crit; PDW, platelet volume distribution width ; NRBC, nucleated red blood cell count; NRBC%, nucleated red blood cell percent; Glu, glucose; Sur, serum urea; Scr, serum creatinine; UA, uric acid; ALT, alanine aminotransferase; AST, aspartate aminotransferase; GGT, γ-glutamyl transferase; ALP, alkaline phosphatase; TP, total protein; Alb, albumin; Glo, globulin; SchE, serum cholinesterase; TBIL, total bilirubin; DBIL, direct bilirubin; IBIL, indirect bilirubin; LDH, lactic acid dehydrogenase; CK, creatine kinase; CK-MB, creatine kinase isozyme; TC, total cholesterol; TG, triglyceride; HDL, high density lipoprotein; LDL, low density lipoprotein;α-AMY, α-amylase; Lip, lipase; GFR, glomerular filtration rate; PT, prothrombin time; PA, prothrombin activity; INR, international normalized ratio; APTT, activated partial thromboplastin time; FIB, fibrinogen; TT, thrombin time; DD, D-Dimer; FDP, fibrin or fibrinogen degradation products; Lac, lactate; CRP, C-reactive protein; PCT, procalcitonin; SOFA, Sequential Organ Failure Assessment score; APACHEII, acute physiology and chronic health scoring system score; GCS, Glasgow Coma Score; 24h UV, 24h urine volume; * P<0.05，**P<0.01，***P<0.001.*
